# Supplementary material for: Cooperative activation of PDK1 and AKT by MAPK4 enhances cancer growth and resistance to therapy
Source: PubMed Central journal article supplement (PMC10395914; doi:10.1371/journal.pbio.3002227), 2023-08-02

Figure 1 A

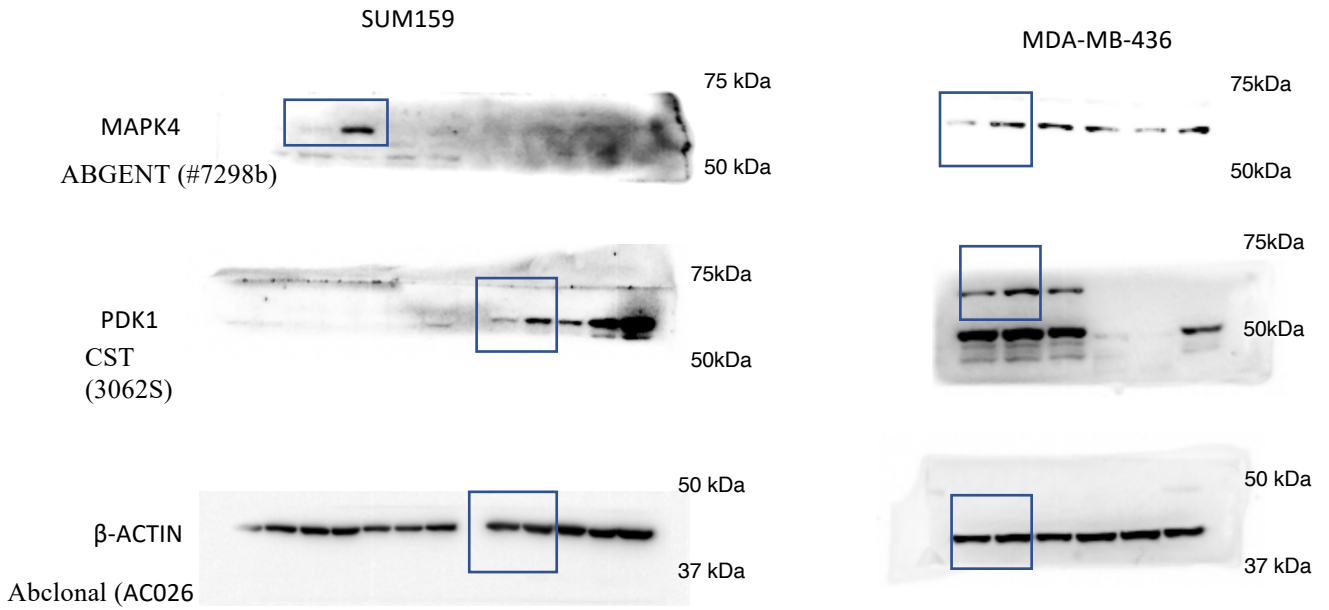

Figure 1 A

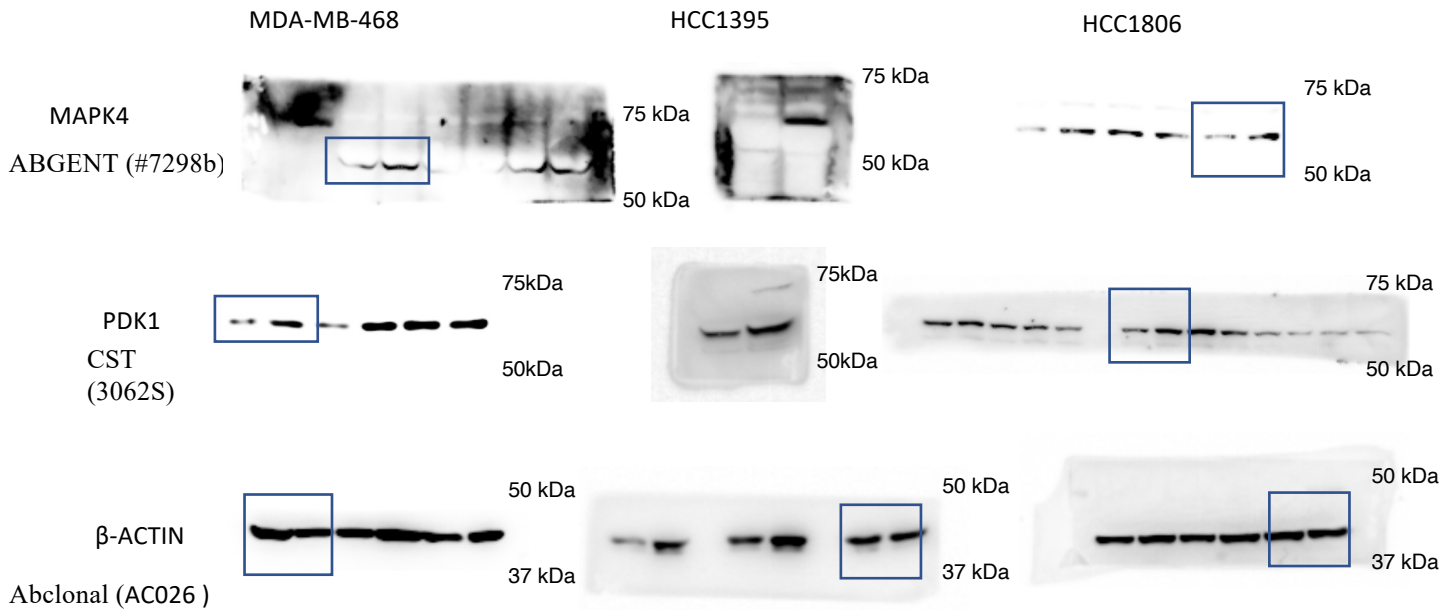

Figure 1 B

HS578T

SUM159

HCC1937

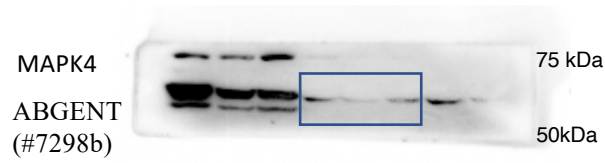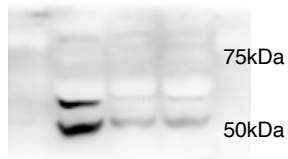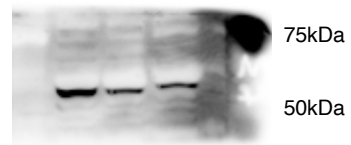

PDK1 75kDa  
CST (3062S) 50kDa

75kDa  
50kDa

75kDa  
50kDa

$\beta$ -ACTIN 50 kDa  
Abclonal (AC026) 37 kDa

50 kDa  
37 kDa

50 kDa  
37 kDa

Figure 1 C

MDA-MB-231

SUM159

MAPK4 75kDa  
ABGENT (#7298b) 50kDa

75kDa  
50kDa

PDK1 75kDa  
CST (3062S) 50kDa

75kDa  
50kDa

$\beta$ -ACTIN 50 kDa  
Abclonal (AC026) 37 kDa

50 kDa  
37 kDa

Figure 1 D

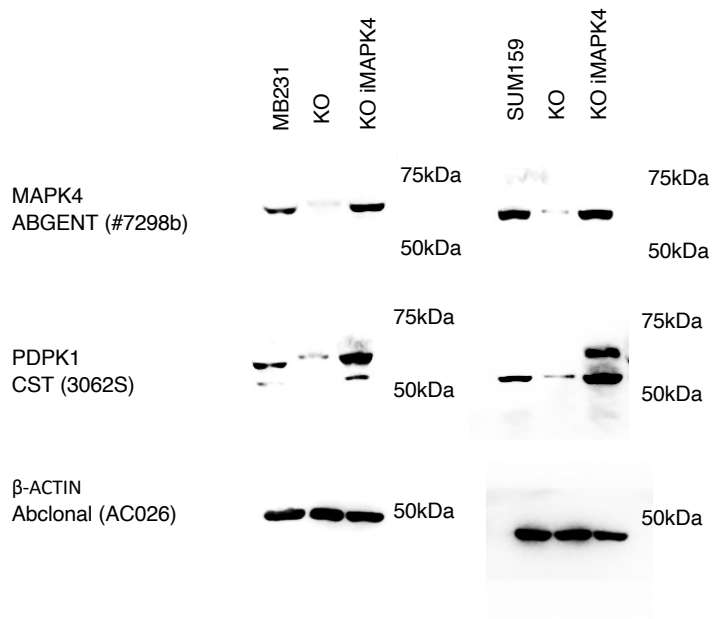

Figure 2A SUM159

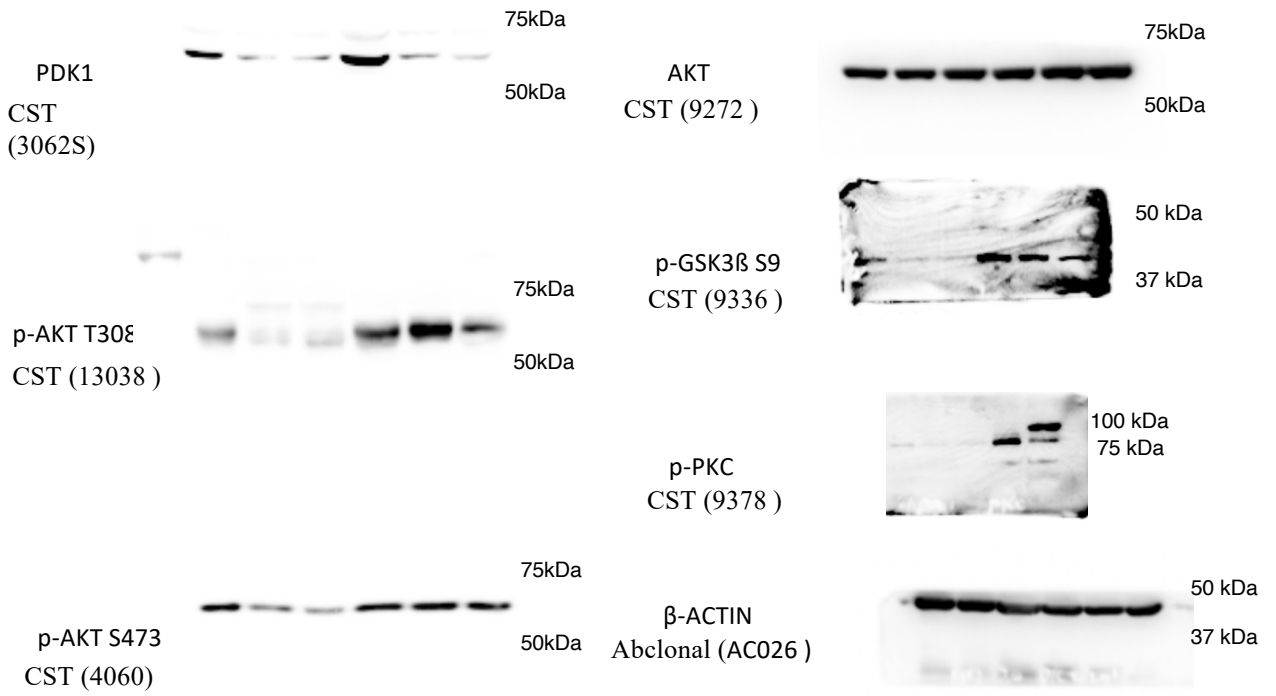

Figure 2A HCC1806

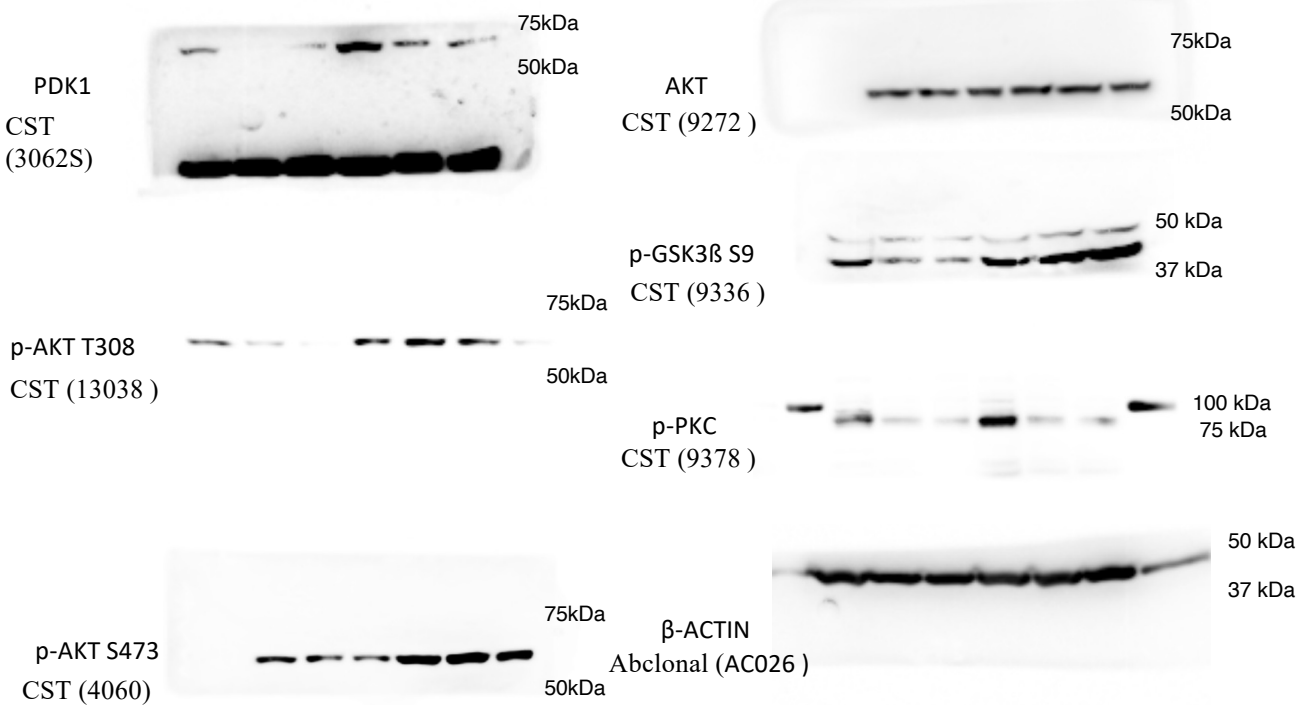

Figure 3A

SUM159

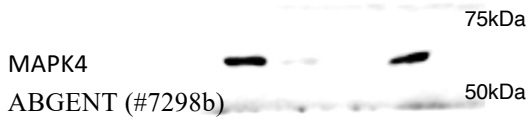

p-AKT S473  
CST (4060)

p-GSK3 $\beta$  S9  
CST (9336)

PDK1  
CST  
(3062S)

p-AKT T308  
CST (13038)

$\beta$ -ACTIN  
Abclonal (AC026)

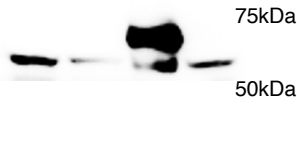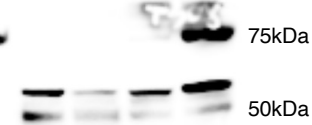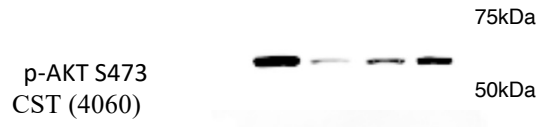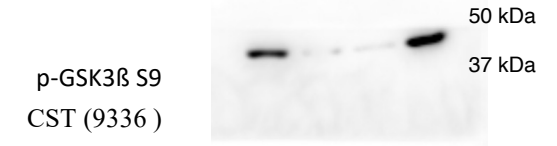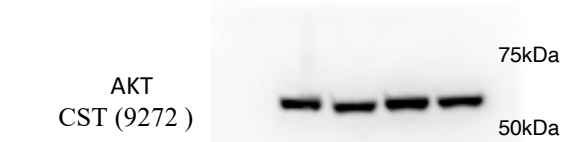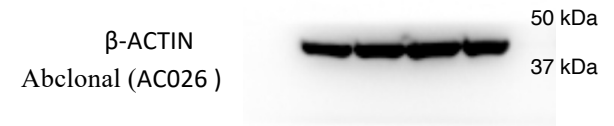

Figure 3A

MDA-MB-231

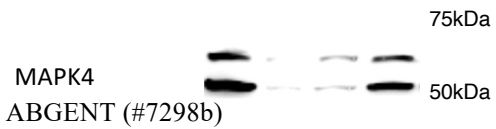

PDK1  
CST  
(3062S)

p-AKT T308  
CST (13038)

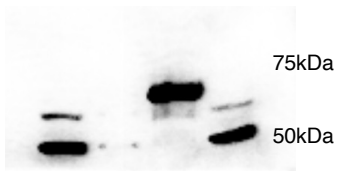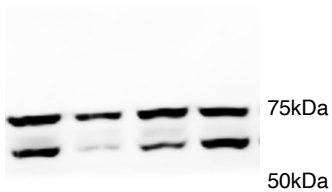

p-AKT S473  
CST (4060)

p-GSK3 $\beta$  S9  
CST (9336)

AKT  
CST (9272)

$\beta$ -ACTIN  
Abclonal (AC026)

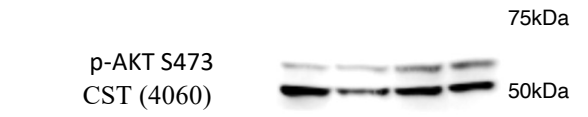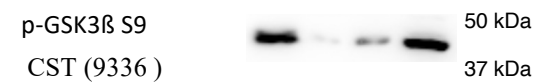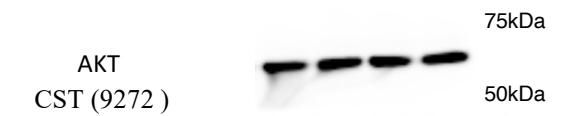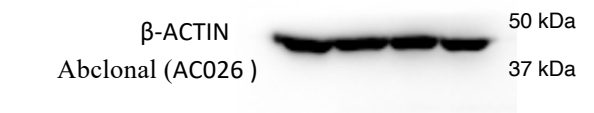

Figure 5A

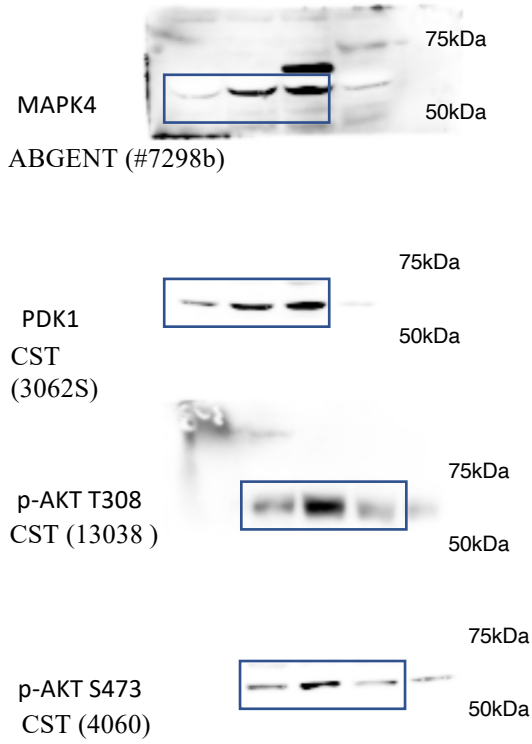

SUM159

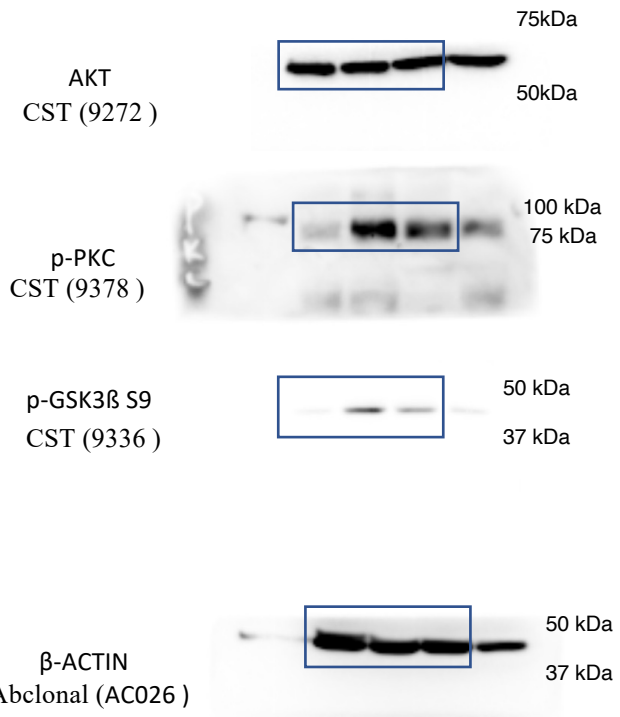

Figure 5A

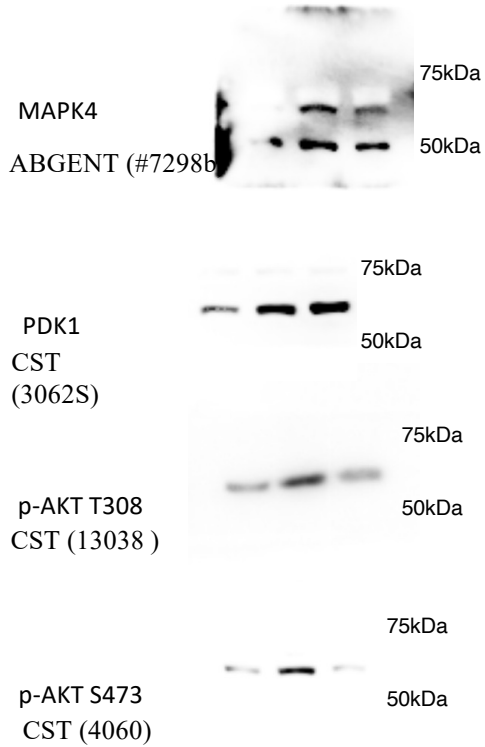

HCC1806

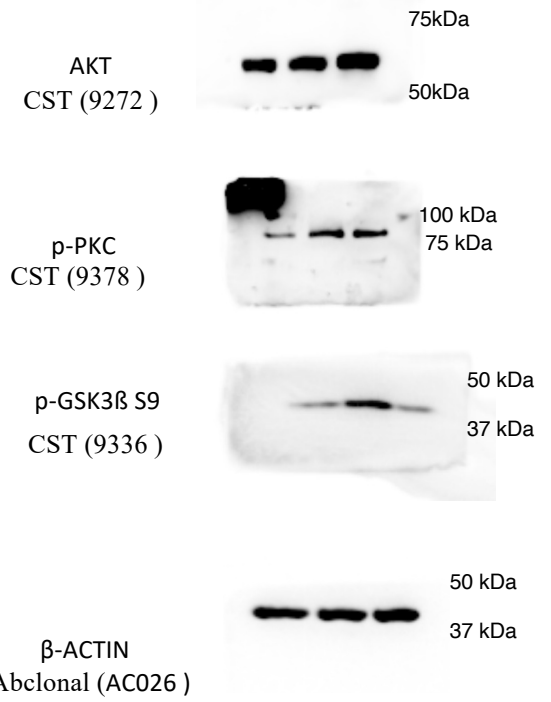

Figure 5E

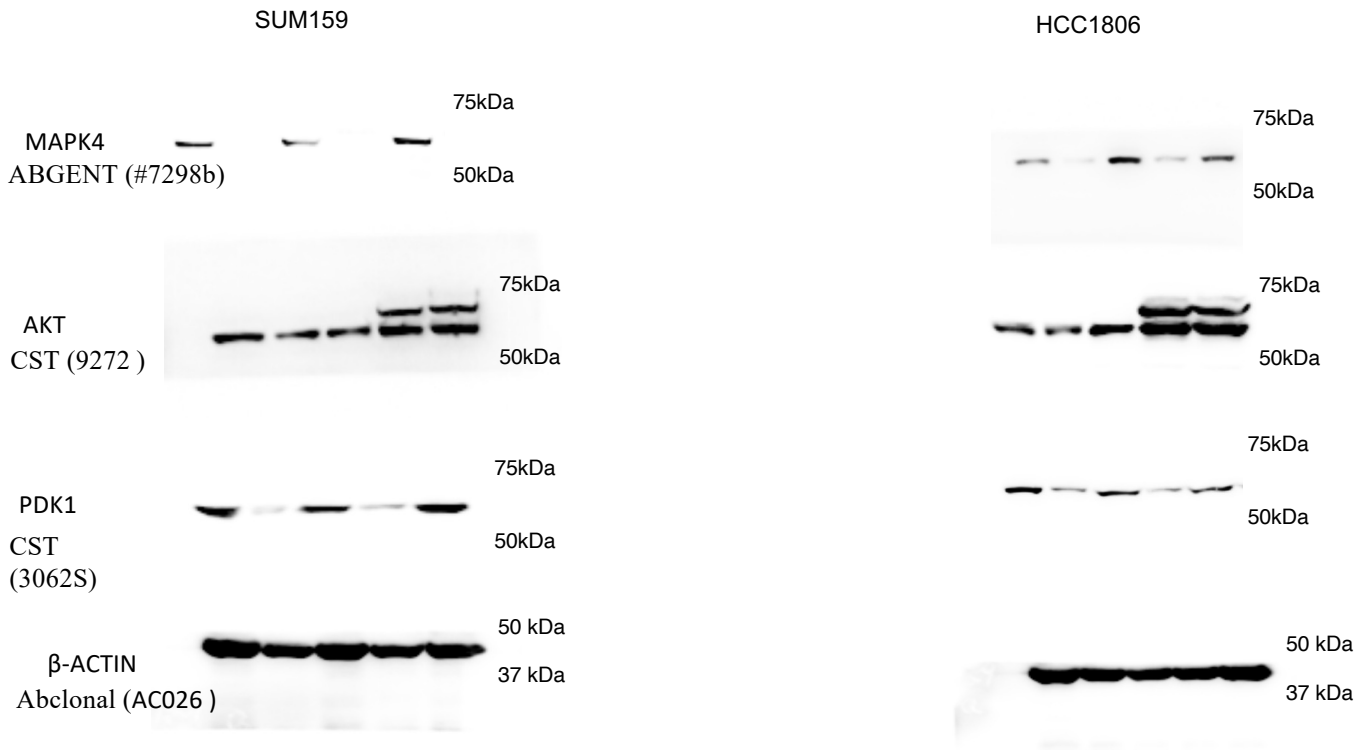

Figure 8A

SUM159

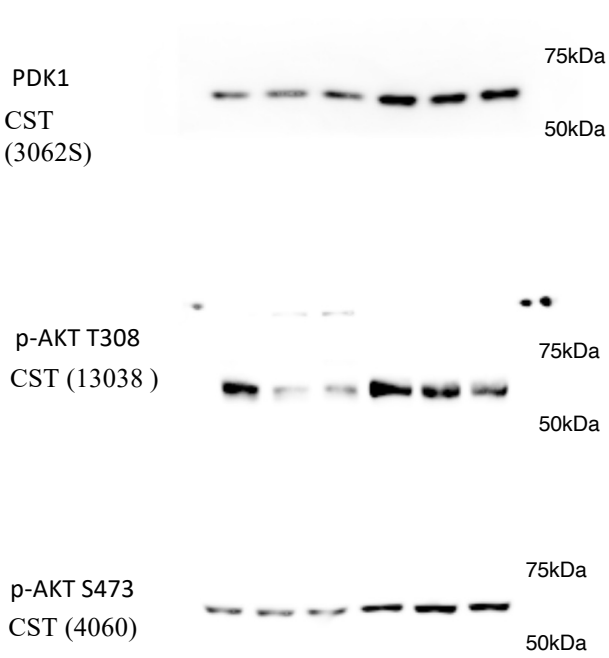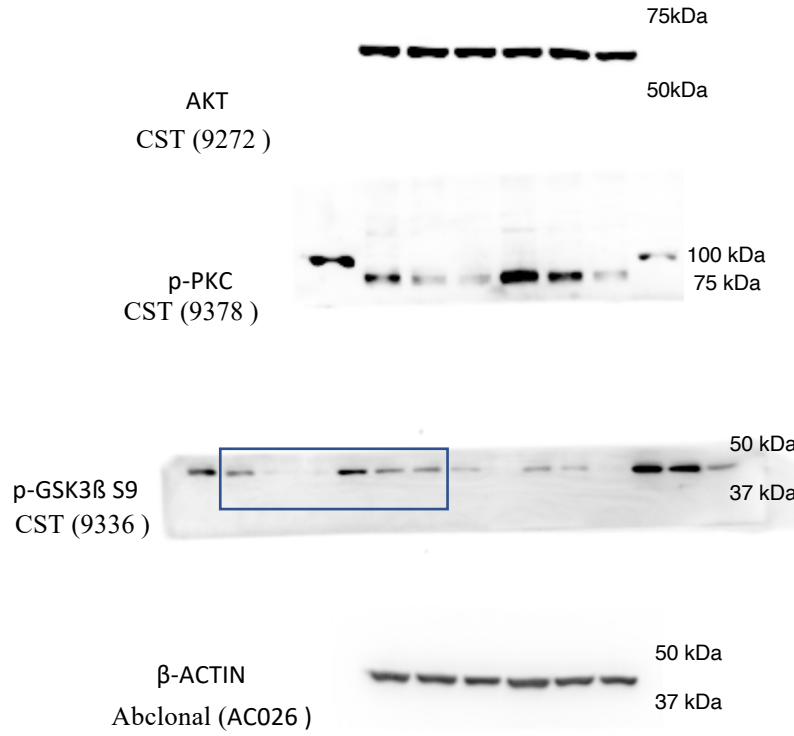

Figure 8A

HCC1806

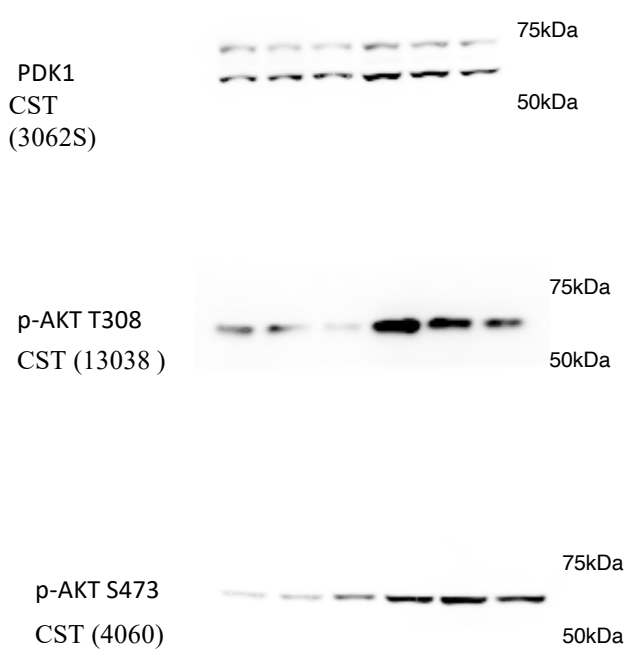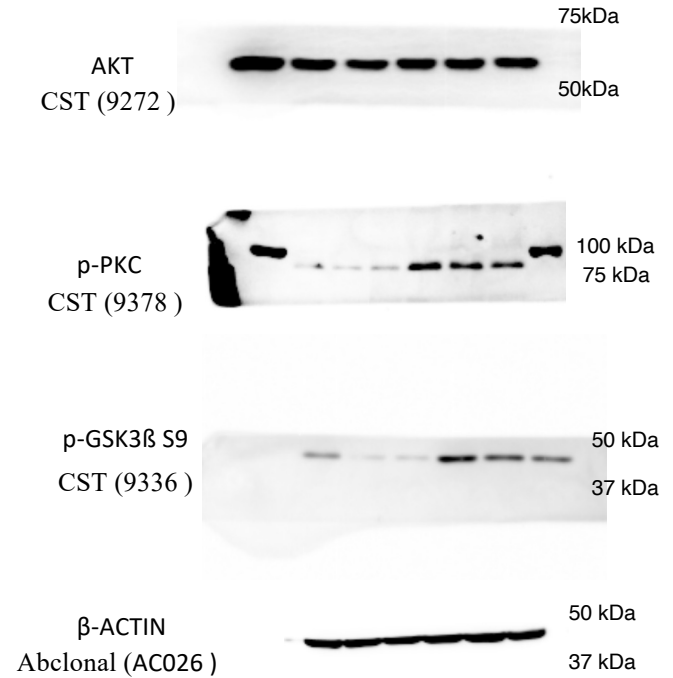



Figure 8B

SUM159

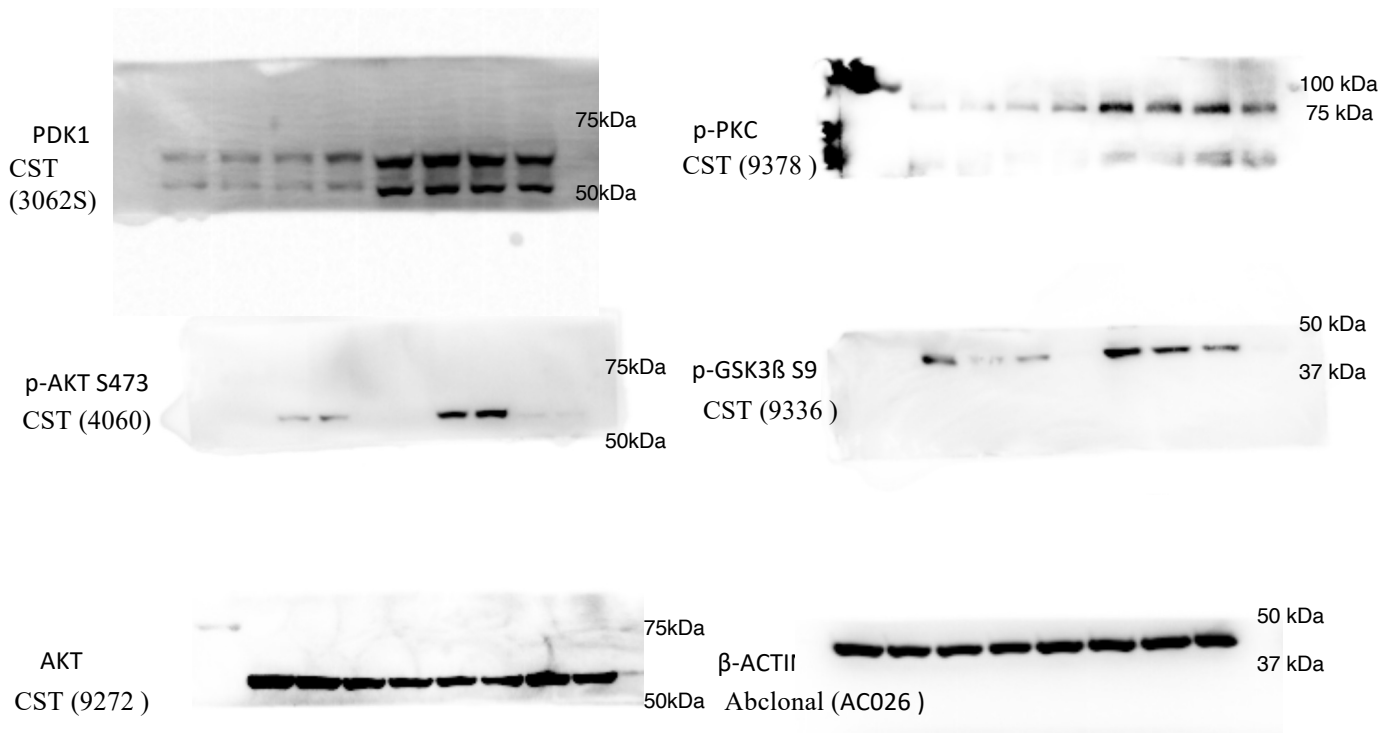

Figure 8B

HCC1806

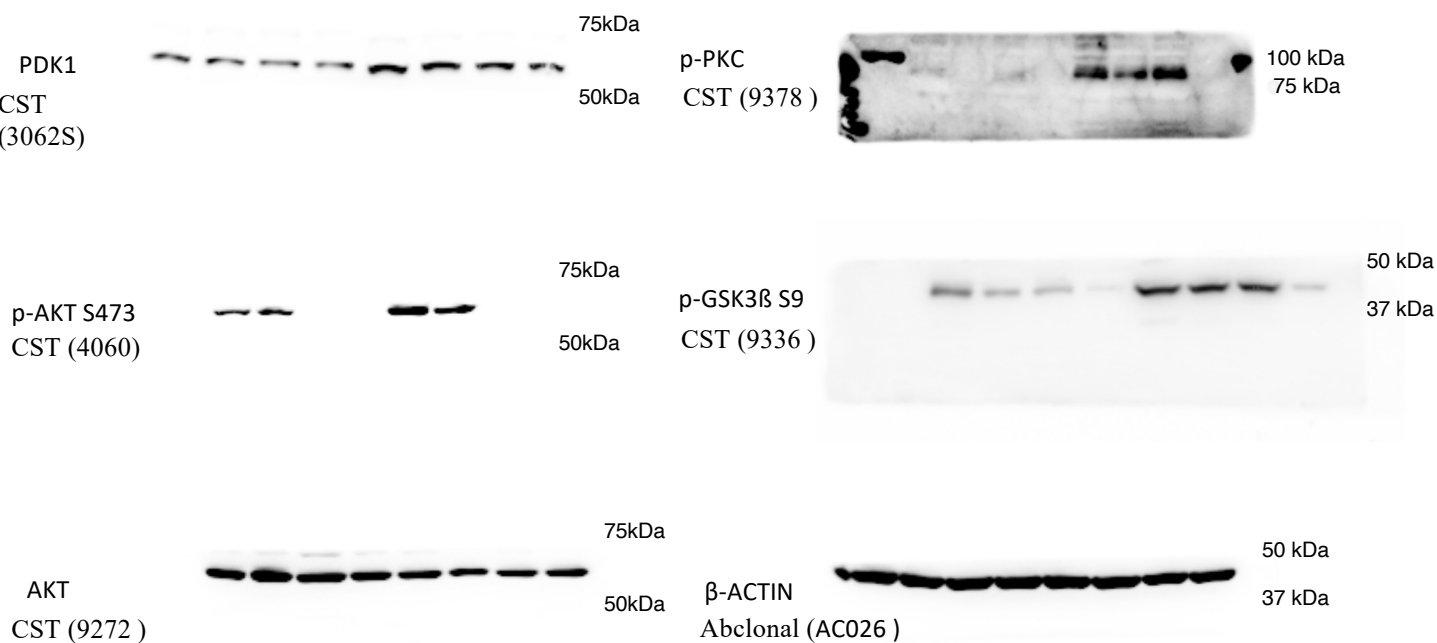

Figure 8D

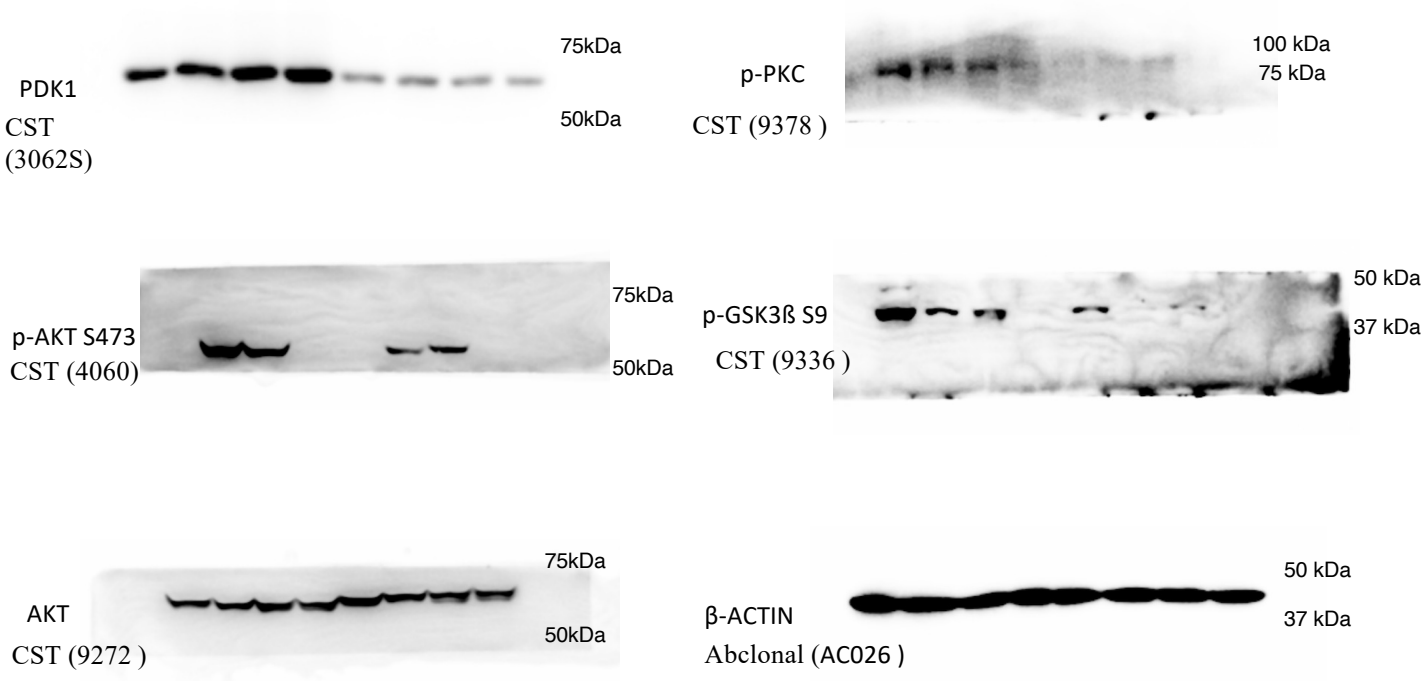

Figure S1 B

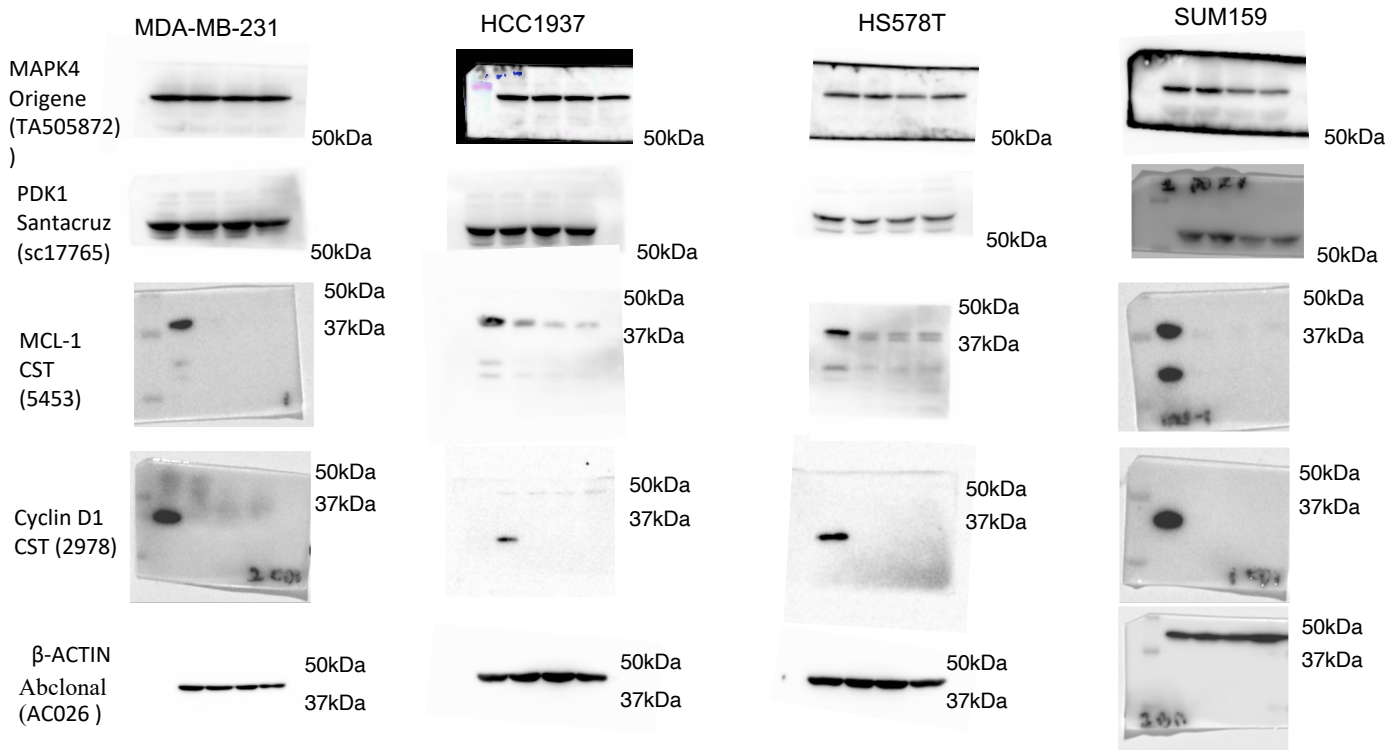

Figure S1 B

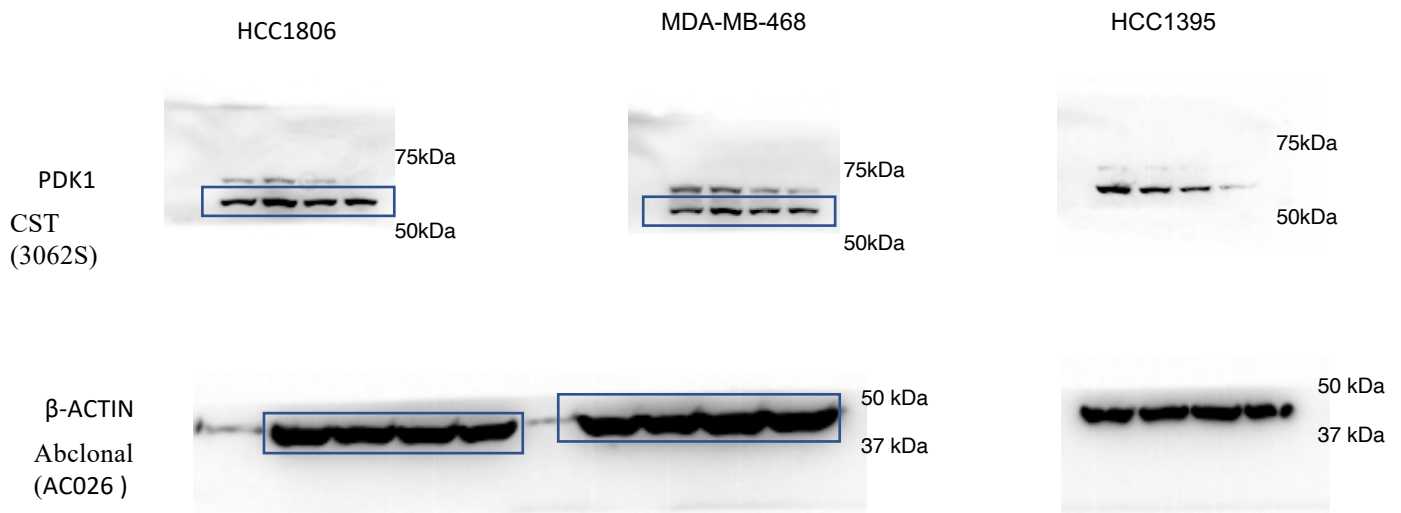

Figure S1C

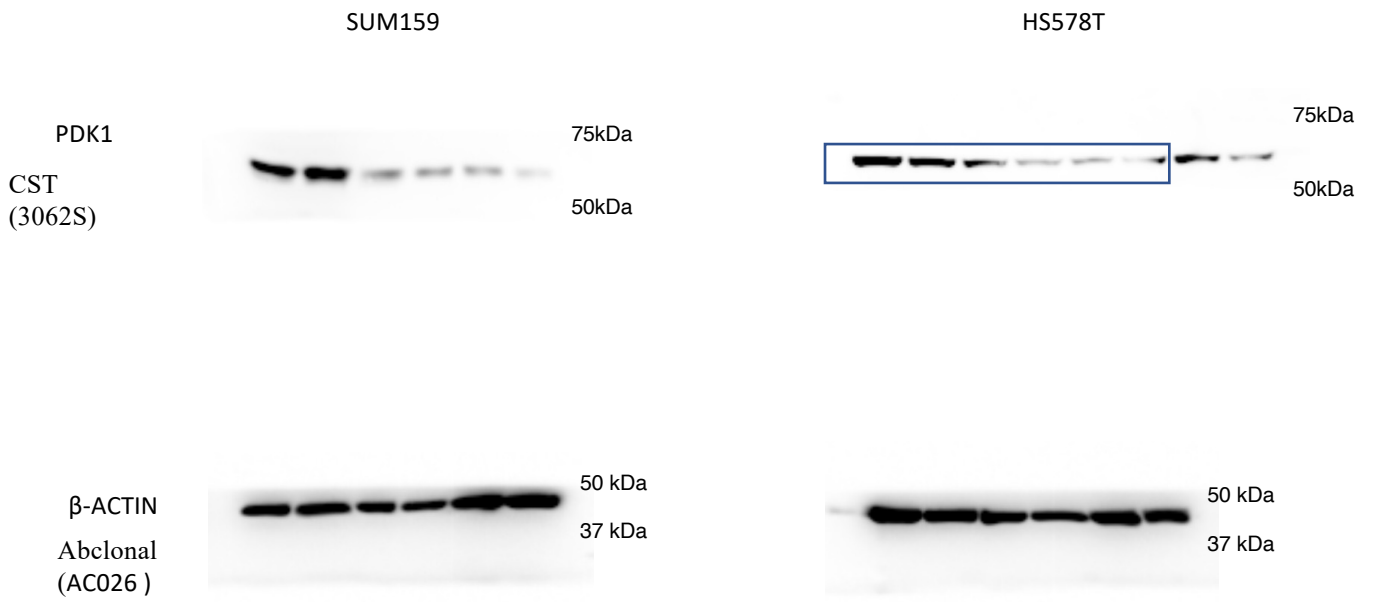

Figure S2A

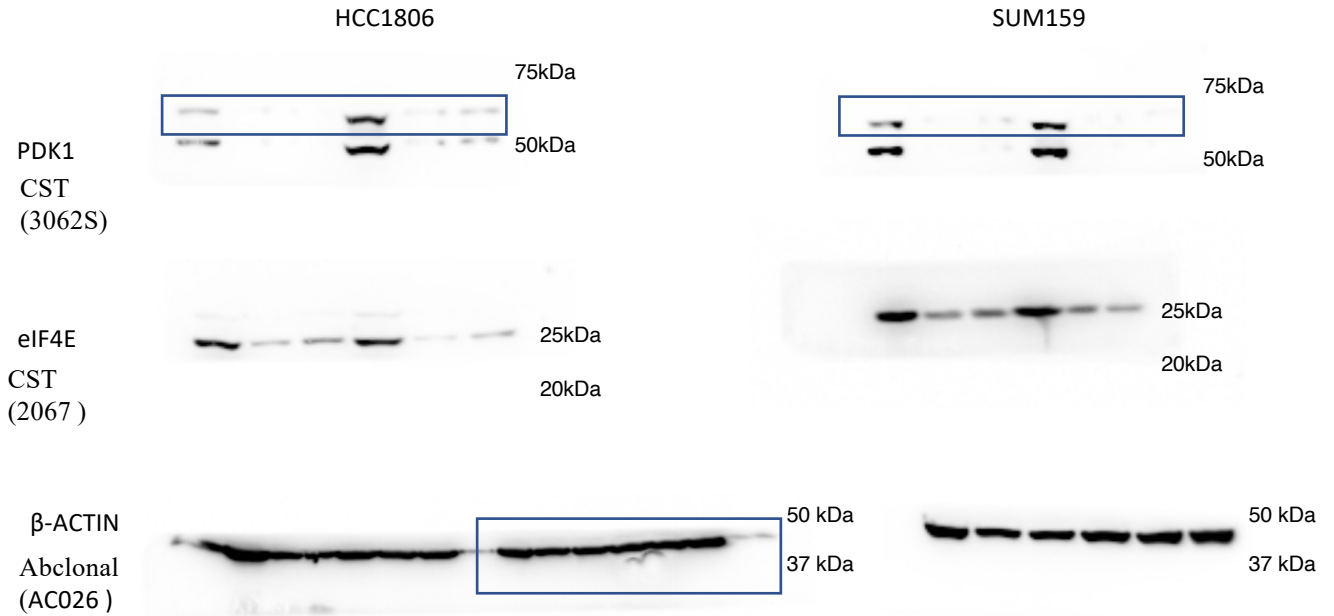

Figure S2 B

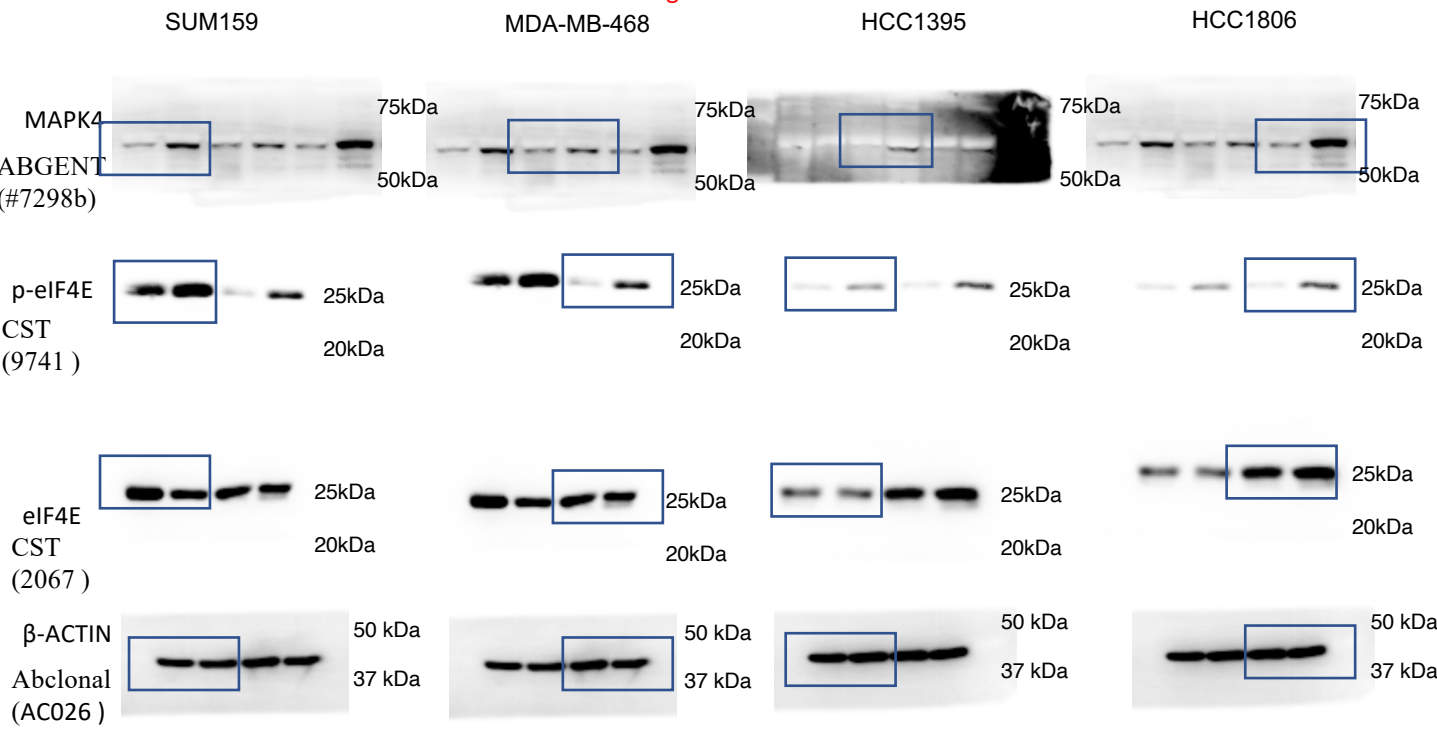

Figure S2 C

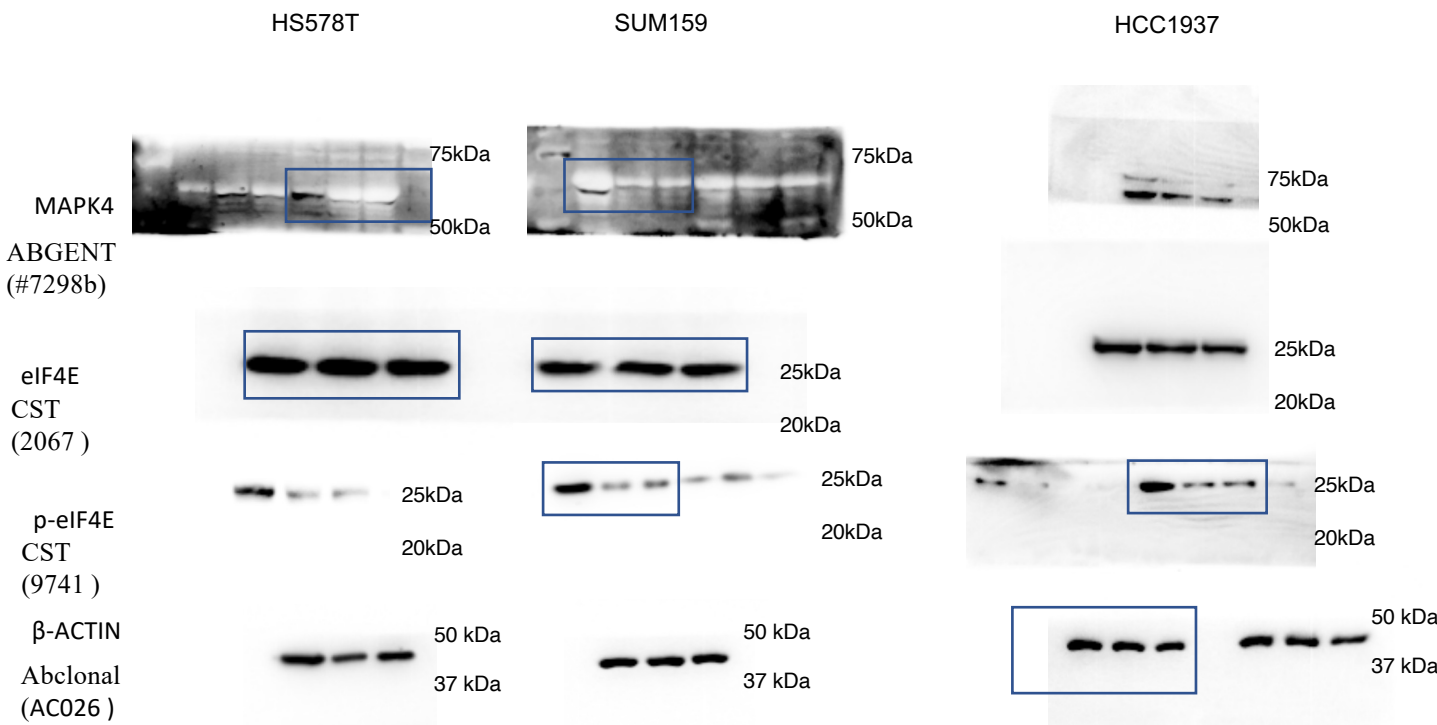

Figure S2 D

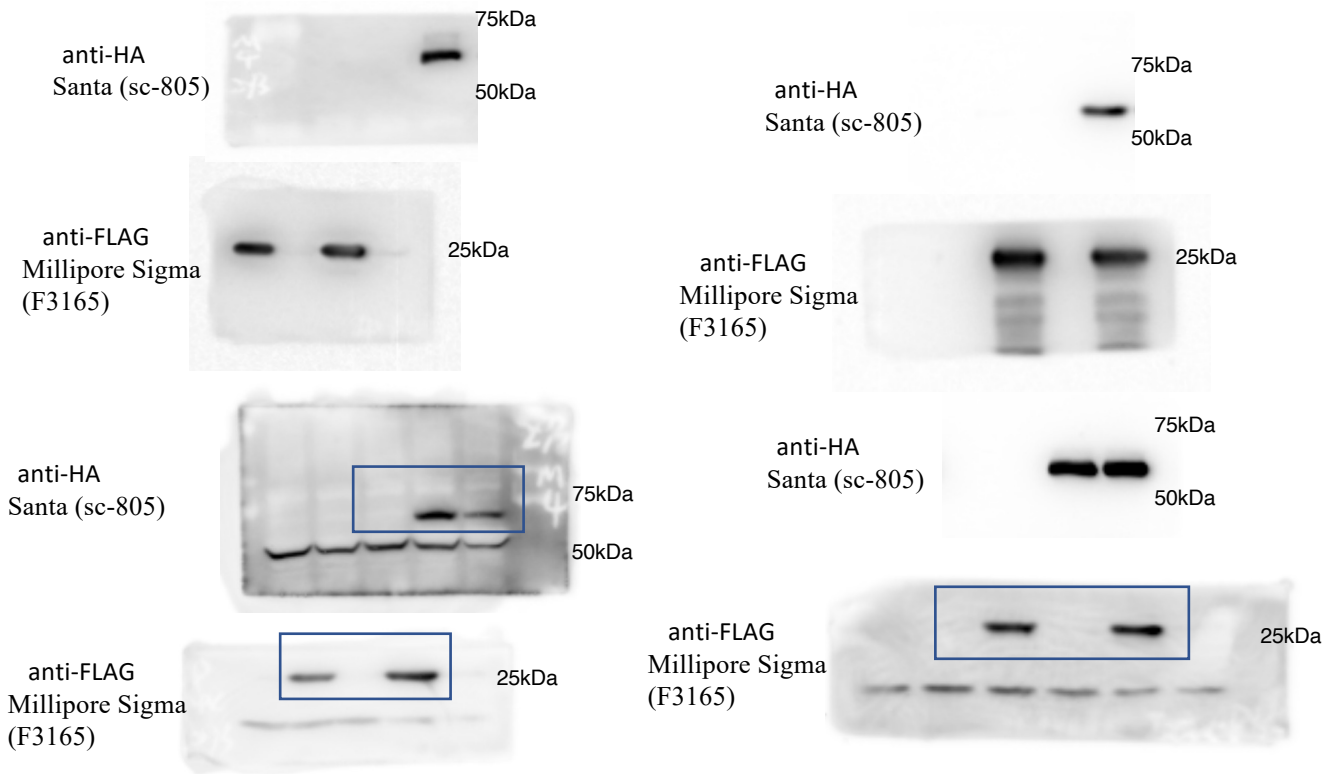

Figure S2 E

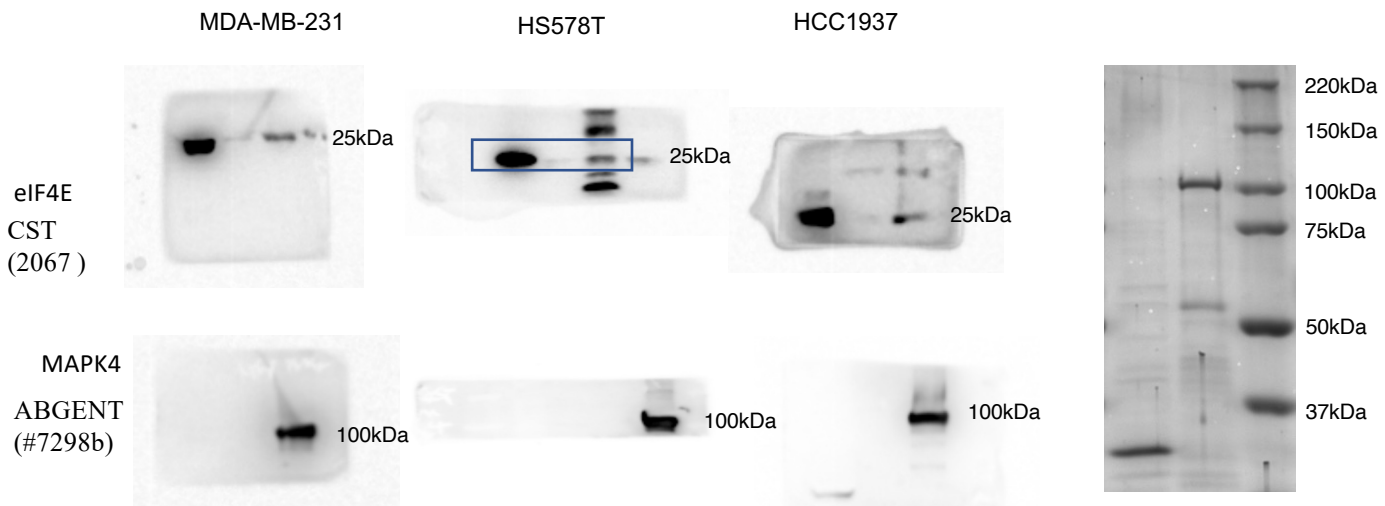

Figure S3A

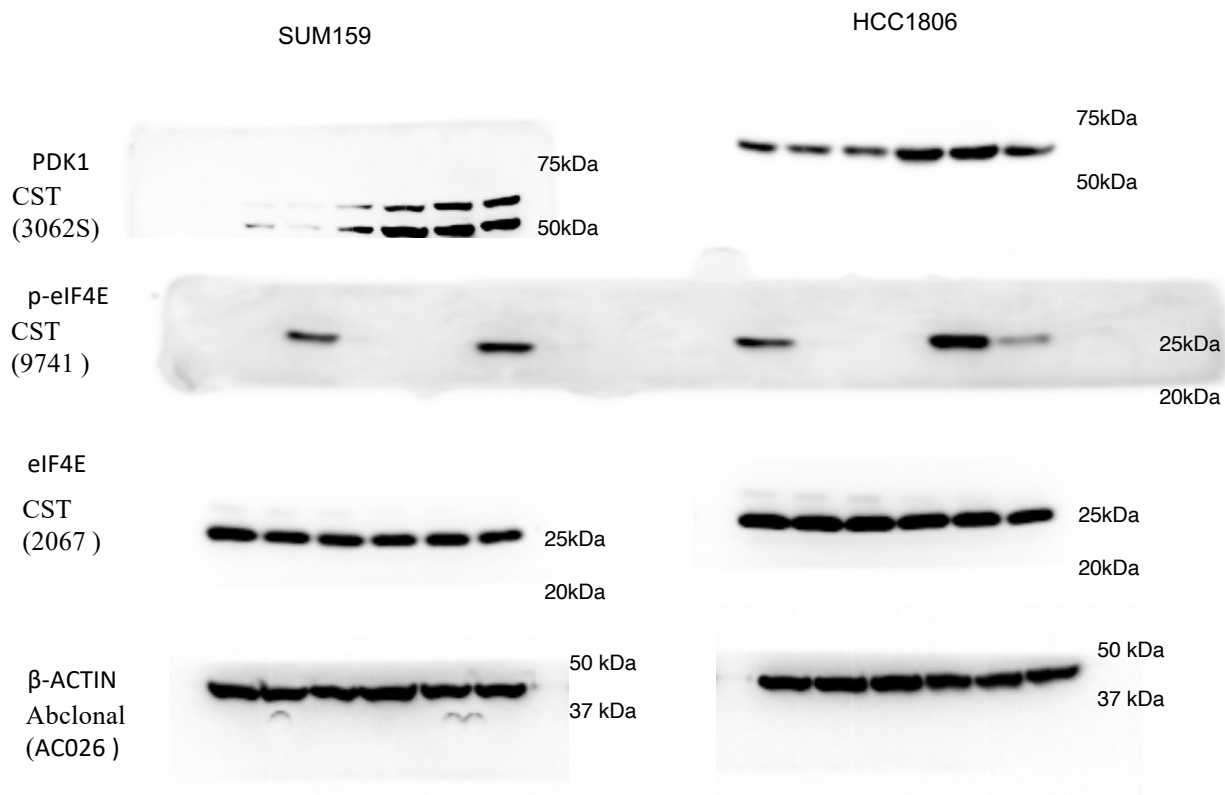

Figure S3B

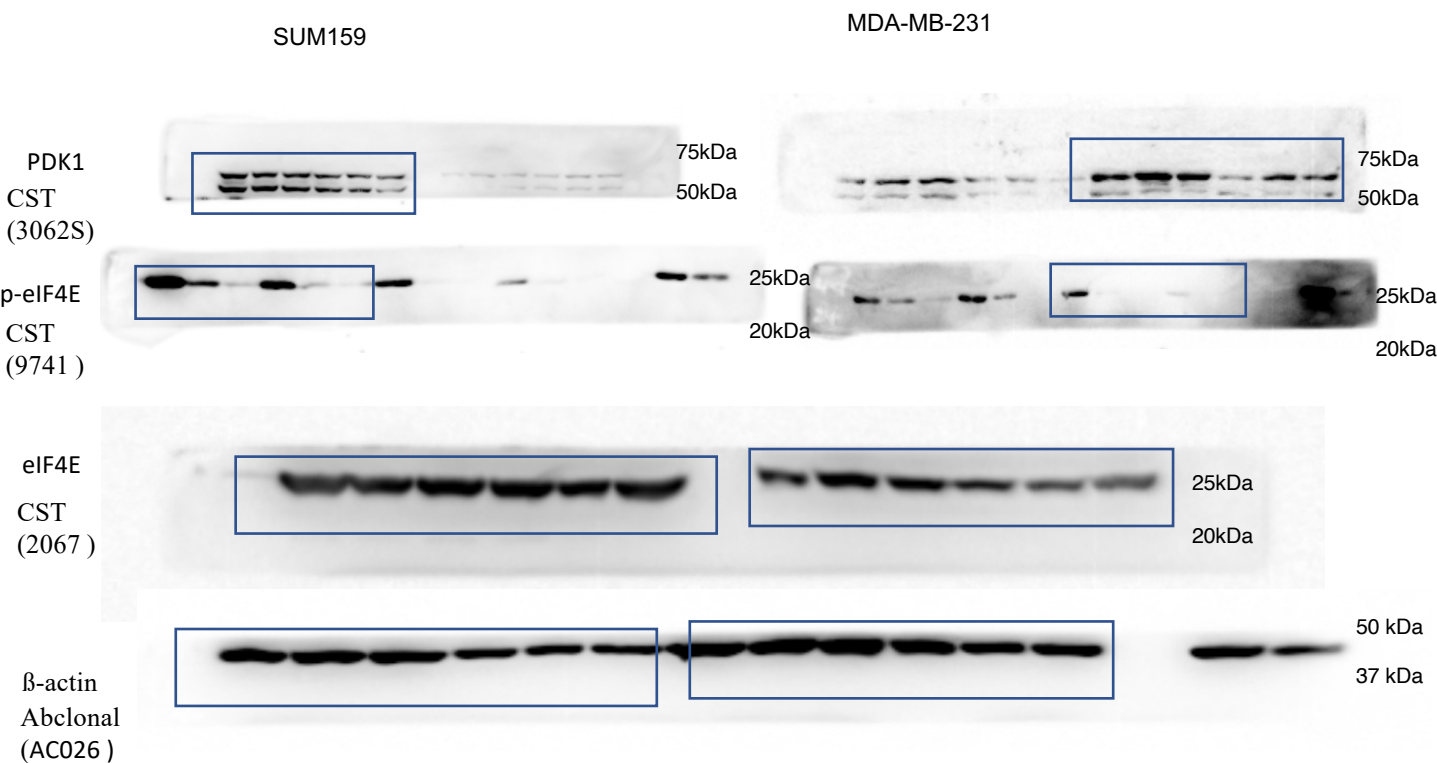

Figure S5

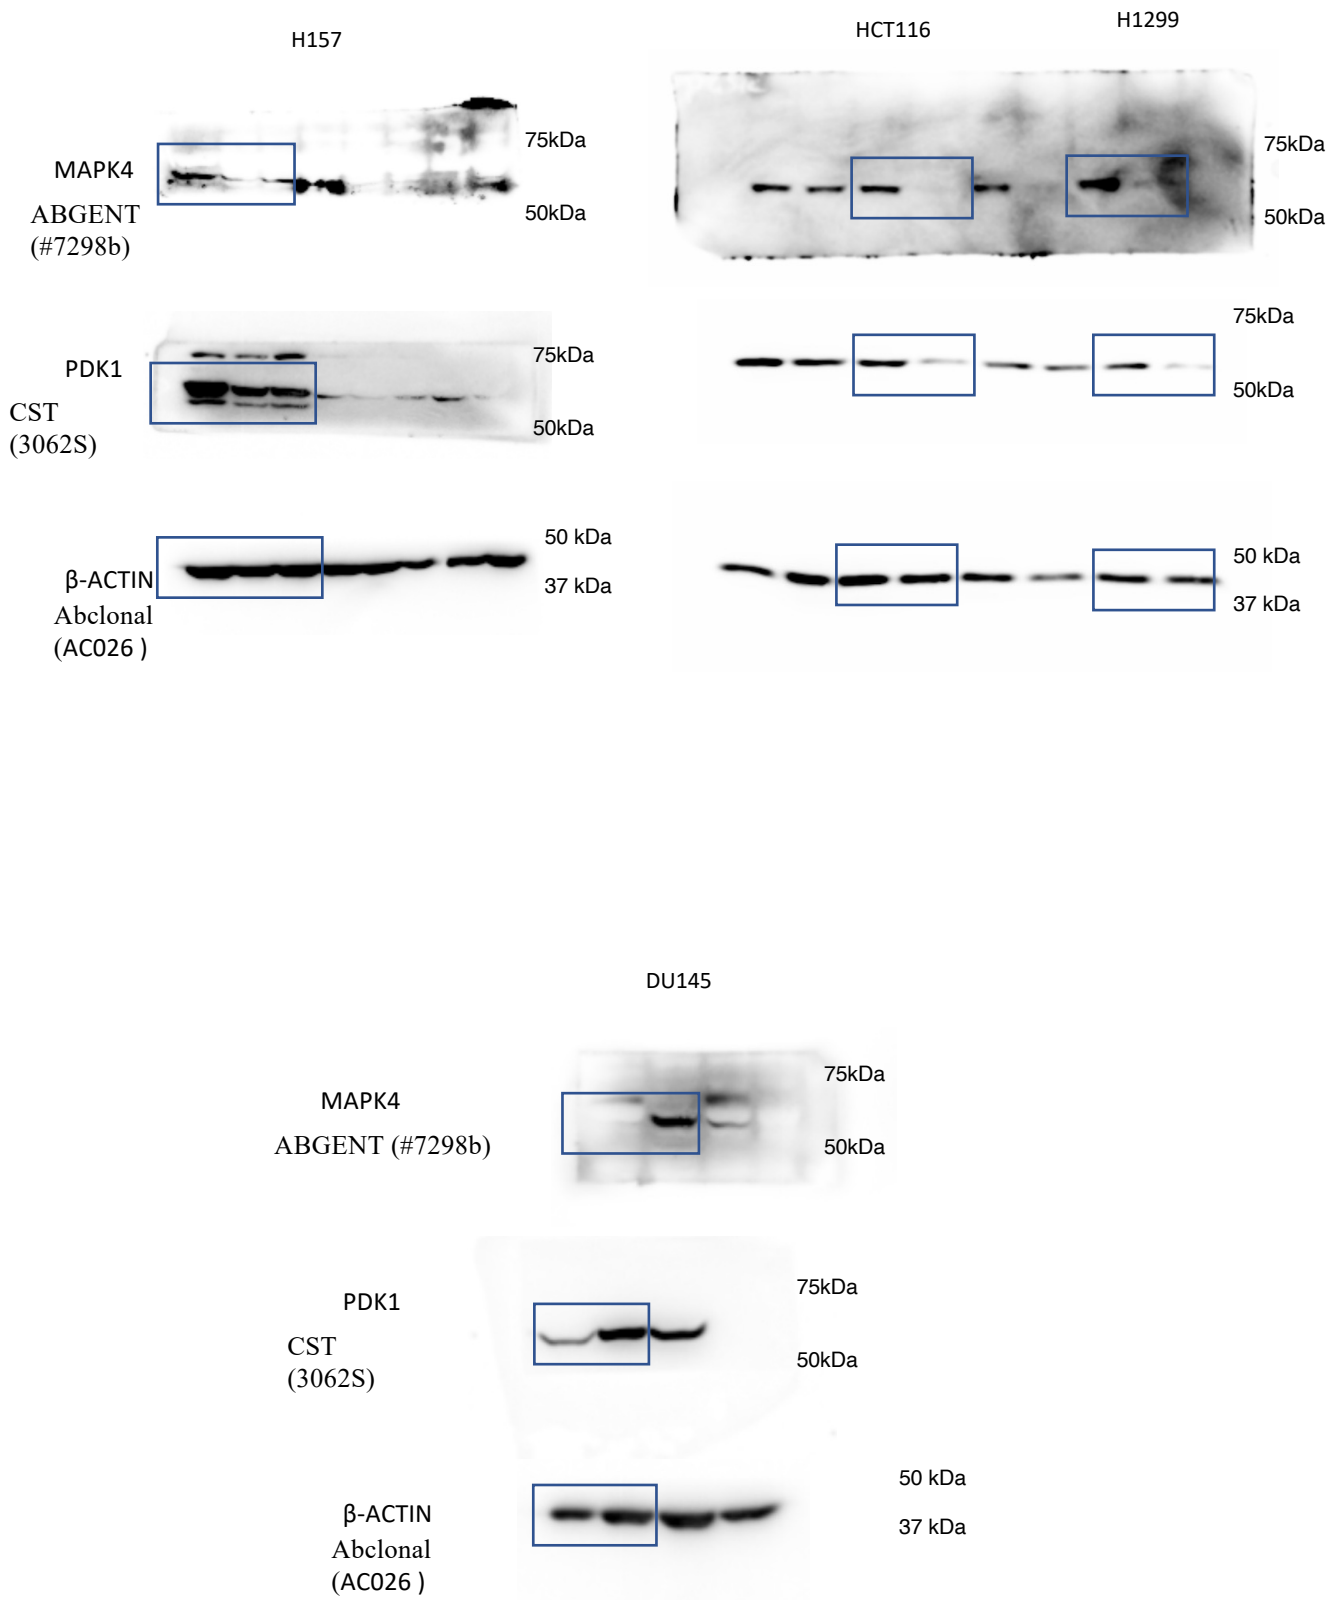

Supplement: pbio.3002227.s006.pdf [file pbio.3002227.s006.pdf]
