# Supplementary material for: Cooperative activation of PDK1 and AKT by MAPK4 enhances cancer growth and resistance to therapy
Source: PLoS Biol. 2023 Aug 2;21(8):e3002227. doi: 10.1371/journal.pbio.3002227 (PMC10395914; doi:10.1371/journal.pbio.3002227)
Supplement: S1 Data — (XLSX) [file pbio.3002227.s007.xlsx]

## Sheet: Figure 2B 
	SUM159
	iCtrl+NT				iCtrl-shPDK1-1				iCtrl-shPDK1-2				iMAPK4-NT				iMAPK4-shPDK1-1				iMAPK4-shPDK1-2
Day 1	0.099	0.091	0.091	0.102	0.082	0.083	0.085	0.087	0.093	0.091	0.084	0.089	0.089	0.094	0.091	0.094	0.095	0.092	0.095	0.098	0.102	0.094	0.095	0.106
Day 3	0.154	0.157	0.157	0.136	0.106	0.113	0.108	0.111	0.124	0.129	0.134	0.116	0.214	0.211	0.208	0.198	0.135	0.13	0.131	0.124	0.136	0.153	0.158	0.146
Day 5	0.346	0.365	0.355	0.333	0.15	0.163	0.155	0.143	0.169	0.178	0.178	0.163	0.565	0.635	0.584	0.65	0.248	0.262	0.279	0.259	0.295	0.315	0.308	0.326
	HCC1806
	iCtrl+NT				iCtrl-shPDK1-1				iCtrl-shPDK1-2				iMAPK4-NT				iMAPK4-shPDK1-1				iMAPK4-shPDK1-2
Day 1	0.109	0.103	0.102	0.092	0.125	0.131	0.119	0.11	0.125	0.118	0.129	0.114	0.137	0.121	0.149	0.131	0.135	0.122	0.125	0.111	0.138	0.133	0.128	0.143
Day 3	0.194	0.182	0.173	0.157	0.139	0.148	0.123	0.149	0.153	0.159	0.163	0.168	0.356	0.359	0.342	0.303	0.22	0.245	0.228	0.193	0.243	0.258	0.259	0.236
Day 5	0.296	0.29	0.293	0.276	0.202	0.196	0.193	0.185	0.215	0.218	0.225	0.214	0.626	0.652	0.711	0.602	0.373	0.394	0.381	0.461	0.401	0.408	0.395	0.387

## Sheet: Figure 2C
	SUM159
	iCtrl-NT	iCtrl-shPDK1-1	iCtrl-shPDK1-2	iMAPK4-NT	iMAPK4-shPDK1-1	iMAPK4-shPDK1-2
	0.931	0.325	0.248	2.851	1.046	1.035
	1.124	0.246	0.316	2.746	0.915	0.826
	1.254	0.393	0.381	2.592	0.842	0.941

## Sheet: Figure 2D
	HCC1806
	iCtrl-NT	iCtrl-shPDK1-1	iCtrl-shPDK1-2	iMAPK4-NT	iMAPK4-shPDK1-1	iMAPK4-shPDK1-2
	0.732	0.245	0.215	2.956	1.636	1.494
	0.785	0.309	0.283	2.893	1.438	1.586
	0.818	0.258	0.226	2.736	1.581	1.333

## Sheet: Figure 2E
	SUM159
	iCtrl-NT	iCtrl-shPDK1-1	iCtrl-shPDK1-2	iMAPK4-NT	iMAPK4-shPDK1-1	iMAPK4-shPDK1-2
	53	13	0	158	34	41
	62	4	0	204	41	33
	74	1	0	216	80	20
	69	0	0	193	51	59
	83	0	2	183	44	61
	91	3	5	148	27	70

## Sheet: Figure 2F
	HCC1806
	iCtrl-NT	iCtrl-shPDK1-1	iCtrl-shPDK1-2	iMAPK4-NT	iMAPK4-shPDK1-1	iMAPK4-shPDK1-2
	31	1	0	109	53	95
	49	3	0	115	56	64
	55	0	2	137	62	58
	60	0	0	159	78	63
	71	0	4	85	90	79
	22	4	0	94	112	84

## Sheet: Figure 3B
	SUM159
	Day	WT			KO-iCtrl			KO-iPDK1			KO-iMAPK4
	1	0.135	0.143	0.148	0.153	0.146	0.159	0.164	0.169	0.153	0.146	0.159	0.135
	3	0.714	0.694	0.78	0.217	0.207	0.239	0.45	0.514	0.489	0.603	0.575	0.495
	5	1.642	1.464	1.432	0.355	0.343	0.356	0.882	0.868	0.741	1.082	0.962	1.148
	MDA-MB-231
	Day	WT			KO-iCtrl			KO-iPDK1			KO-iMAPK4
	1	0.235	0.245	0.241	0.215	0.22	0.245	0.257	0.232	0.204	0.239	0.216	0.229
	3	0.832	0.795	1.043	0.321	0.395	0.416	0.431	0.515	0.429	0.694	0.614	0.509
	5	1.932	1.805	2.052	0.643	0.541	0.698	1.105	1.095	1.197	1.496	1.367	1.417

## Sheet: Figure 3C
	SUM159
	WT	KO-iCtrl	KO-iPDK1	KO-iMAPK4
	3.484	0.845	2.076	2.753
	3.394	0.732	1.903	2.432
	3.281	1.093	2.245	2.395
	MDA-MB-231
	WT	KO-iCtrl	KO-iPDK1	KO-iMAPK4
	2.464	0.745	1.462	1.843
	2.376	0.532	1.509	1.957
	2.789	0.622	1.393	1.643

## Sheet: Figure 3D
	SUM159
	WT	KO-iCtrl	KO-iPDK1	KO-iMAPK4
	168	9	80	154
	193	2	117	139
	109	6	65	162
	183	9	135	109
	188	12	109	148
	202	10	94	155
	MDA-MB-231
	WT	KO-iCtrl	KO-iPDK1	KO-iMAPK4
	168	13	90	138
	112	15	89	153
	108	20	115	112
	124	34	73	109
	157	5	74	142
	198	9	63	124

## Sheet: Figure 3E
	SUM159
	Tumor size
	WT						KO-iCtrl						KO-iPDK1						KO-iMAPK4
W5	0.52	0.065	0.52	0.26	0.1872	0.52	0	0	0	0	0	0	0.065	0.52	0.065	0.065	0.065	0.26	0.26	0.13	0.13	0.52	0.52	0.065
W6	2.925	7.75772	4.50528	0.78	7.97732	12.5823	0	0	0	0	0	0	0.13	2.34	0.78	0.46592	0.3328	0.30576	2.34	3.92594	0.78	3.89077	2.808	9.1975
W7	10.6748	16.5672	10.2918	3.89077	13.6309	25.48	0	0	0	0	0	0	0.78	4.36027	2.34	1.46318	2.34	3.3696	7.61332	9.2625	2.34	10.6844	9.21164	13.3047
W8	34.6581	27.5592	19.2357	8.61632	22.8238	55.2751	0	0	0	0	0	0	2.34	8.49905	6.52409	6.28363	5.76939	10.9906	26.1721	15.7696	7.40899	20.5356	30.9912	14.9207
W9	51.057	46.5522	48.2034	59.9795	65.1436	96.0372	0	0	0	0	0	0	8.13035	14.4697	10.4374	13.896	20.3546	23.6535	49.207	45.698	16.046	43.6372	51.5776	47.6525
W10	147.33	141.915	148.544	167.081	124.471	105.247	0	0	0	0	0	0	34.5627	31.6326	59.9146	30.8568	92.0705	60.9359	136.987	96.7763	78.1376	99.5591	92.6757	108.52
W11	322.7	328.537	308.094	283.664	324.22	344.624	0	0	0	0	0	0	49.681	88.9215	77.2746	75.9629	176.059	96.1934	178.104	167.534	178.085	224.74	242.711	249.337
	Tumor weight
	WT	KO-iCtrl	KO-iPDK1	KO-iMAPK4
	0.9625	0	0.5346	0.6384
	0.8413	0	0.4295	0.5246
	0.6357	0	0.2346	0.3556
	0.5824	0	0.2845	0.5282
	0.5829	0	0.2146	0.5692
	0.5736	0	0.1842	0.6983

## Sheet: Figure 3F
	MDA-MB-231
	Tumor size
	WT						KO-iCtrl						KO-iPDK1						KO-iMAPK4
W4	0.52	0.065	0.52	0.26	0.1872	0.52	0.065	0	0.00624	0	0	0	0.065	0.52	0.065	0.065	0.065	0	0.26	0.13	0.13	0.52	0.52	0.065
W5	3.159	0.78	8.775	2.34	11.6002	0.78	0.13	0	0.065	0	0	0	0.52	0.26	0.26	1.56	0.78	0	0.78	6.5	4.16	1.872	7.23217	2.457
W6	4.8672	2.46697	9.24235	4.39265	20.9227	3.99243	0.569745	0	0.344897	0	0	0	3.92594	4.32513	5.4772	1.55113	5.72587	0	15.9454	12.9645	5.06383	6.3675	23.6508	12.3051
W7	43.1122	43.0941	46.1392	45.0172	21.1579	36.3732	5.88931	0	0.39936	0	0	0	19.9897	22.0849	19.5038	5.06383	8.61	0	34.7901	18.8606	44.4204	34.5191	40.6449	37.762
W8	83.5509	87.1261	79.9147	74.517	47.4523	90.5851	10.3599	0	9.78549	0	0	0	21.1498	41.828	17.5188	34.5191	33.0009	0	109.891	127.32	78.7039	77.9144	87.2733	87.3323
W9	170.073	194.049	111.714	177.544	68.2622	192.706	19.8426	0	25.3355	0	0	0	124.932	47.7459	27.234	30.4715	46.0874	0	226.705	170.031	141.432	172.449	123.467	214.013
W10	220.028	234.311	184.612	240.061	245.311	327.286	56.7993	0	36.9583	0	0	0	162.06	84.9719	118.517	71.4179	106.952	0	340.855	293.557	273.948	223.231	255.364	387.305
	Tumor weight
	WT	KO-iCtrl	KO-iPDK1	KO-iMAPK4
	0.4152	0.1673	0.2047	0.6884
	0.3808	0.178	0.2492	0.5017
	0.5859	0	0.2743	0.4274
	0.4127	0	0.3108	0.5307
	0.5693	0	0.3011	0.6646
	0.4835	0	0	0.5554

[truncated: 18 more sheets: Figure 4A, Figure 4B, Figure 5B, Figure 5C, Figure 5D, Figure 5F, Figure 5G, Figure 6A, Figure 6B, Figure 7A, Figure 7B, Figure 7C, Figure 8C, Figure 8E, Figure S1A, Figure S3C, Figure S3D, Figure S4]
